# Supplementary material
Source: publisher figshare collection journal article supplement (https://gsapubs.figshare.com/articles/dataset/_/12534224)
Supplement: Supplementary file 1 [file 1]

Table DR1: Complete list of the 24 runs used in this paper.

| Run Name                          | Tidal Amplitude<br>[m] | Initial sediment<br>composition<br>[%sand-%mud] | Total simulation time<br>[days] |
|-----------------------------------|------------------------|-------------------------------------------------|---------------------------------|
| RL-A <sub>3</sub> -S <sub>1</sub> | 1.5                    | 25-75                                           | 2640                            |
| RL-A <sub>2</sub> -S <sub>1</sub> | 0.5                    |                                                 |                                 |
| RL-A <sub>1</sub> -S <sub>1</sub> | 0.25                   |                                                 |                                 |
| RL-A <sub>0</sub> -S <sub>1</sub> | 0                      |                                                 |                                 |
| RL-A <sub>3</sub> -S <sub>2</sub> | 1.5                    | 50-50                                           |                                 |
| RL-A <sub>2</sub> -S <sub>2</sub> | 0.5                    |                                                 |                                 |
| RL-A <sub>1</sub> -S <sub>2</sub> | 0.25                   |                                                 |                                 |
| RL-A <sub>0</sub> -S <sub>2</sub> | 0                      |                                                 |                                 |
| RL-A <sub>3</sub> -S <sub>3</sub> | 1.5                    | 100-0                                           |                                 |
| RL-A <sub>2</sub> -S <sub>3</sub> | 0.5                    |                                                 |                                 |
| RL-A <sub>1</sub> -S <sub>3</sub> | 0.25                   |                                                 |                                 |
| RL-A <sub>0</sub> -S <sub>3</sub> | 0                      |                                                 |                                 |
| RS-A <sub>3</sub> -S <sub>1</sub> | 1.5                    | 25-75                                           | 110                             |
| RS-A <sub>2</sub> -S <sub>1</sub> | 0.5                    |                                                 |                                 |
| RS-A <sub>1</sub> -S <sub>1</sub> | 0.25                   |                                                 |                                 |
| RS-A <sub>0</sub> -S <sub>1</sub> | 0                      |                                                 |                                 |
| RS-A <sub>3</sub> -S <sub>2</sub> | 1.5                    | 50-50                                           |                                 |
| RS-A <sub>2</sub> -S <sub>2</sub> | 0.5                    |                                                 |                                 |
| RS-A <sub>1</sub> -S <sub>2</sub> | 0.25                   |                                                 |                                 |
| RS-A <sub>0</sub> -S <sub>2</sub> | 0                      |                                                 |                                 |
| RS-A <sub>3</sub> -S <sub>3</sub> | 1.5                    | 100-0                                           |                                 |
| RS-A <sub>2</sub> -S <sub>3</sub> | 0.5                    |                                                 |                                 |
| RS-A <sub>1</sub> -S <sub>3</sub> | 0.25                   |                                                 |                                 |
| RS-A <sub>0</sub> -S <sub>3</sub> | 0                      |                                                 |                                 |

Table DR2: Data used to calculate  $A^*$  and  $H^*$  in all the runs and in modern deltas. Data for modern deltas is from Thompson (1968), Allen et al. (1979), Caline and Huong (1992), Guillen and Palanques (1992), Carriquiry and Sánchez (1999), Lambiase et al. (2002), Syvitski and Saito (2007), Baitis (2008), Kim et al. (2009), Sassi et al. (2011), Shaw et al. (2013), Shaw and Mohrig (2014), Cummings et al. (2016).

| Initial Sediment Composition | Tidal Amplitude [m] | Shoreline [m] | Area [m <sup>2</sup> ] | Slope [-] | Qw [m <sup>3</sup> /s] | ½ Tidal Period [s] | H <sub>1</sub> Depth [m] | H <sub>1</sub> Grainsize [mm] | H <sub>2</sub> Depth [m] | H <sub>2</sub> Grainsize [mm] | A*         | H <sub>1</sub> * | H <sub>2</sub> * |
|------------------------------|---------------------|---------------|------------------------|-----------|------------------------|--------------------|--------------------------|-------------------------------|--------------------------|-------------------------------|------------|------------------|------------------|
| 100-0                        | 0                   |               |                        |           | 2000                   | -                  | 6.94                     | 0.21                          | 6.31                     | 0.194                         | 0          | 33068.1          | 32553.09         |
| 100-0                        | 0.25                | 2265.3        | 7250893                | 0.00057   | 2000                   | 22050              | 7.27                     | 0.189                         | 6.78                     | 0.192                         | 0.00795852 | 38462.96         | 35320.83         |
| 100-0                        | 0.5                 | 2374.39       | 7018459                | 0.001     | 2000                   | 22050              | 12.00                    | 0.2                           | 9.13                     | 0.2                           | 0.01675680 | 60027.5          | 45635.5          |
| 100-0                        | 1.5                 | 2386.14       | 5140991                | 0.001     | 2000                   | 22050              | 12.76                    | 0.2                           | 12.51                    | 0.2                           | 0.10992458 | 63801.5          | 62574            |
| 50-50                        | 0                   |               |                        |           | 2000                   | -                  | 8.85                     | 0.15                          | 6.59                     | 0.156                         | 0          | 59039.33         | 42282.69         |
| 50-50                        | 0.25                | 2610.7        | 9762638                | 0.00045   | 2000                   | 22050              | 9.96                     | 0.179                         | 5.85                     | 0.146                         | 0.01177712 | 55670.95         | 40055.48         |
| 50-50                        | 0.5                 | 2753.39       | 7972377                | 0.0007    | 2000                   | 22050              | 9.66                     | 0.165                         | 5.32                     | 0.092                         | 0.02344895 | 58570.91         | 57879.35         |
| 50-50                        | 1.5                 | 2395.55       | 4206146                | 0.001     | 2000                   | 22050              | 13.31                    | 0.17                          | 10.21                    | 0.16                          | 0.08958247 | 78286.47         | 63834.37         |
| 25-75                        | 0                   |               |                        |           | 2000                   | -                  | 6.23                     | 0.116                         | 6.22                     | 0.128                         | 0          | 53702.58         | 48574.22         |
| 25-75                        | 0.25                | 2764.7        | 8480778                | 0.00041   | 2000                   | 22050              | 12.94                    | 0.15                          | 7.78                     | 0.142                         | 0.01060340 | 86312.66         | 54826.76         |
| 25-75                        | 0.5                 | 2776.45       | 6678393                | 0.00043   | 2000                   | 22050              | 11.67                    | 0.124                         | 8.32                     | 0.124                         | 0.03171137 | 94112.09         | 67104.84         |
| 25-75                        | 1.5                 | 2510.21       | 4497021                | 0.00074   | 2000                   | 22050              | 15.96                    | 0.146                         | 10                       | 0.139                         | 0.12351709 | 109316.44        | 71942.44         |
| WLD                          | 0.2                 | 10000         | 104719755              | 0.0001    | 4800                   | 22050              | 5                        | 0.094                         |                          |                               | 0.03957662 | 53290.41         |                  |
| WLD                          | 0.2                 | 8000          | 67020643               | 0.0001    | 4800                   | 22050              | 4                        | 0.094                         |                          |                               | 0.03166130 | 42632.33         |                  |
| Han                          | 4.5                 | 45000         | 2.1e+09                | 0.0002    | 5000                   | 22050              | 30                       | 0.25                          |                          |                               | 42.8571428 | 120000           |                  |
| Mahakam                      | 0.6                 | 41000         | 1.3e+09                | 0.0005    | 3000                   | 22050              | 5                        | 0.07                          |                          |                               | 0.35287695 | 71428.57         |                  |
| Copper                       | 1.7                 | 40000         | 1.92e+09               | 0.0006    | 7000                   | 22050              | 5                        | 0.07                          |                          |                               | 1.49789439 | 71428.57         |                  |
| Colorado (CA)                | 2.5                 | 50000         | 6.34e+08               | 0.0004    | 2182                   | 22050              | 5                        | 0.07                          | 6                        | 0.07                          | 4.11790136 | 71428.57         | 85714.2857       |
| Baram                        | 0.85                | 26000         | 3e+08                  | 0.0005    | 2270                   | 44100              | 5                        | 0.06                          |                          |                               | 0.16655256 | 83333.33         |                  |
| Ebro                         | 0.1                 | 28000         | 3.38e+08               | 0.00021   | 2475                   | 22050              | 6                        | 0.101                         |                          |                               | 0.01053308 | 59405.94         |                  |

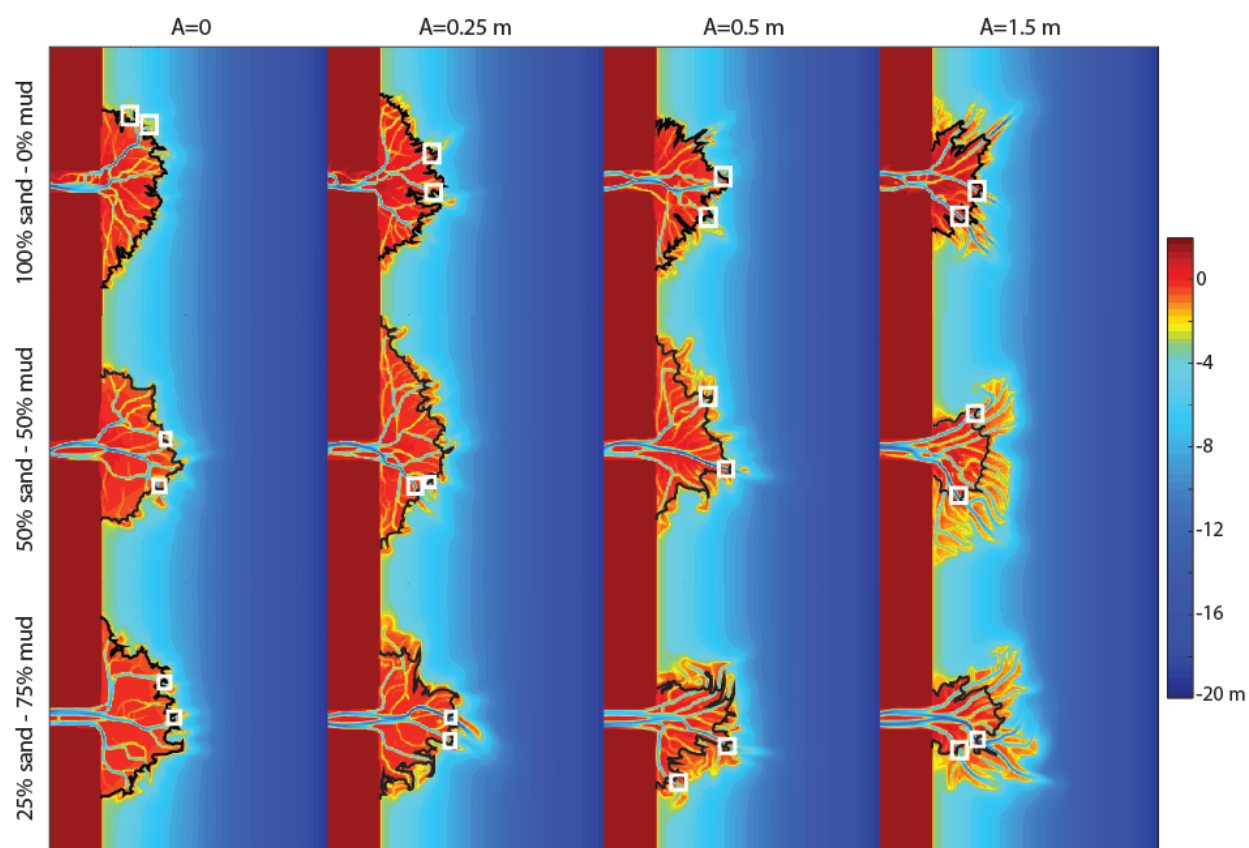

Figure DR1: Location of the two deepest channels (white rectangles) used to calculate  $H^*$  (see Table DR2). The shoreline position is marked by the black line.

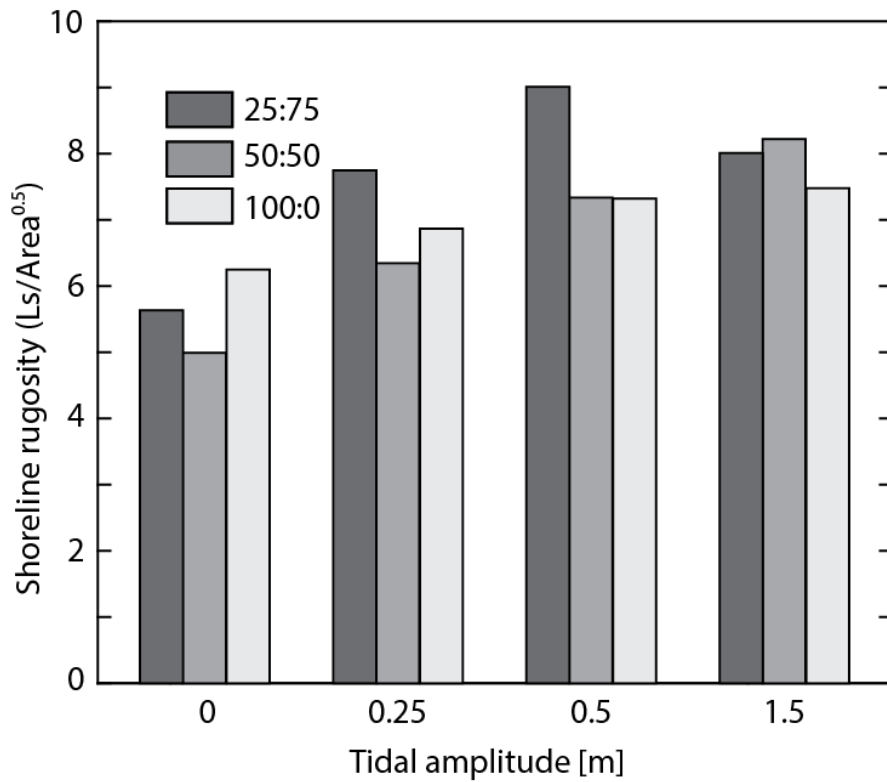

Figure DR2: Final shoreline rugosity for all model runs. The rugosity is calculated as the ratio of the total shoreline length (Ls) to the square root of the subaerial delta surface area (Area), based on Wolinsky et al. (2010).

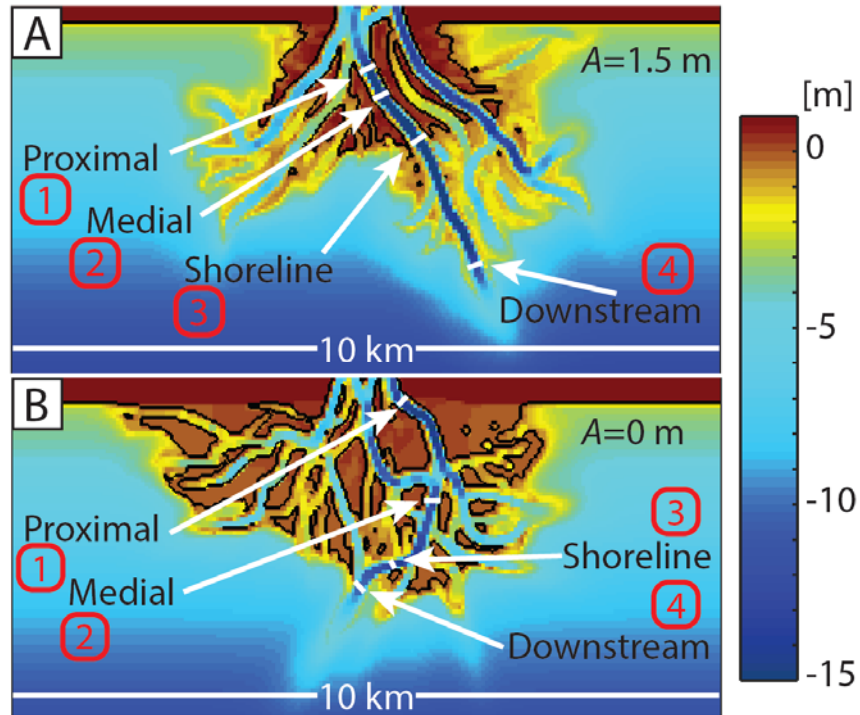

Figure DR3: Position of the four locations along the main distributary channel in which the width-averaged parameters shown in Fig. 5 (sea level, flow velocity, suspended sediment flux, bedload sediment flux) have been calculated. (A) Locations in the 50:50 run with  $A=1.5$  m. (B) Locations in the 50:50 run with  $A=0$  m.

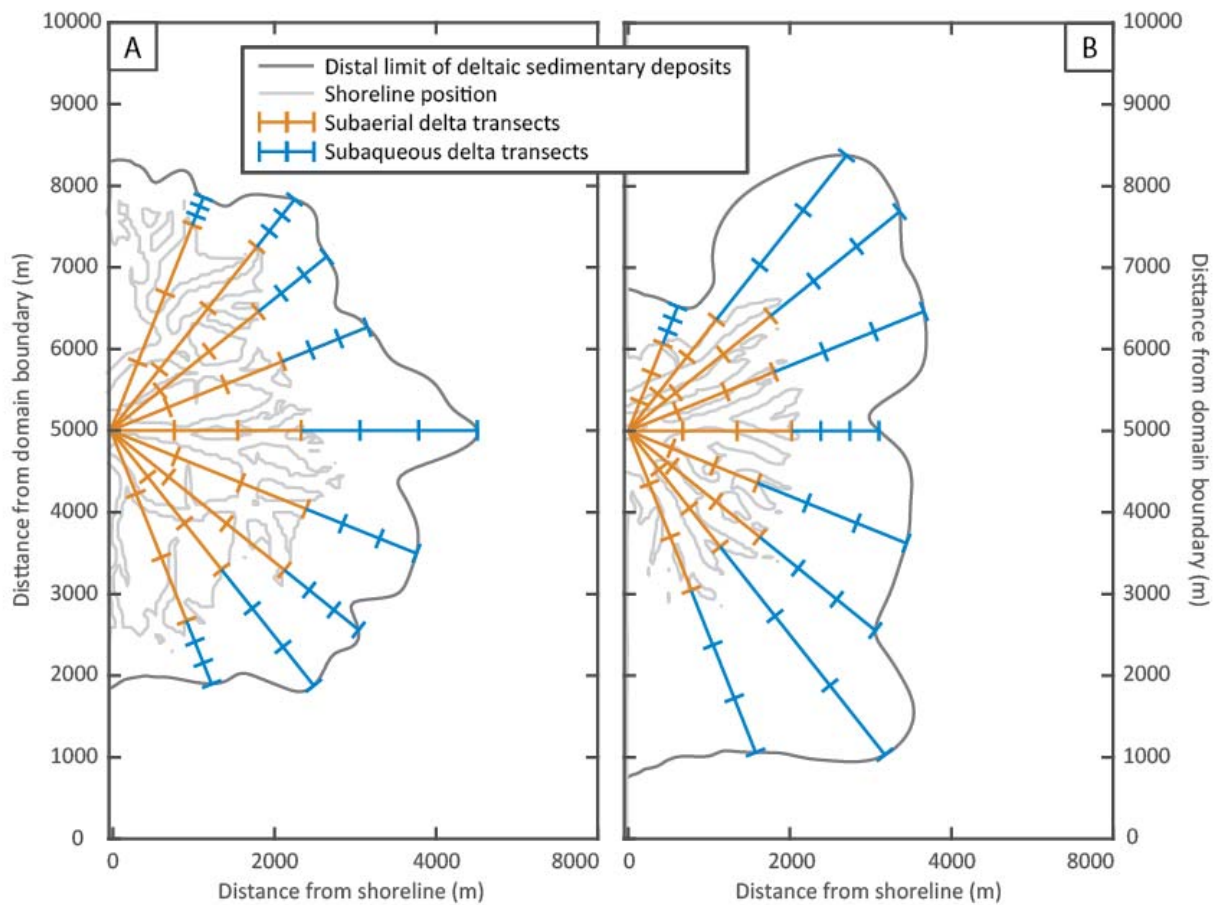

Figure DR4: Position of the transects along which the percentages of sand and mud in the deltaic deposits (Fig. 6) have been calculated. (A) Position of the transects in the 50:50 run with  $A=0$ . (B) Position of the transects in the 50:50 run with  $A=1.5$  m. The subaerial delta transects include deposits from the delta apex to the shoreline. The subaqueous delta transects include deposits from the shoreline to the prodelta.

## REFERENCES CITED

- Allen, G. P., Laurier, D., and Thouvein, J., 1979, Étude sédimentologique du delta de la Mahakam, Compagnie française des pétroles - Total, Notes et Mémoires.
- Baitis, E., 2008, Grain Sizes of Recent Siliciclastic Deposits in Wax Lake Delta, Louisiana [BSc: The University of Texas at Austin.
- Caline, B., and Huong, J., 1992, New insight into the recent evolution of the Baram Delta from satellite imagery: Geological Society of Malaysia Bulletin, v. 32, p. 1-13.
- Carriquiry, J. D., and Sánchez, A., 1999, Sedimentation in the Colorado River delta and Upper Gulf of California after nearly a century of discharge loss: Marine Geology, v. 158, no. 1-4, p. 125-145.
- Cummings, D., Dalrymple, R., Choi, K., and Jin, J., 2016, The Tide-dominated Han River Delta, Korea: Geomorphology, Sedimentology, and Stratigraphic Architecture, Elsevier.
- Guillen, J., and Palanques, A., 1992, Sediment dynamics and hydrodynamics in the lower course of a river highly regulated by dams: the Ebro River: Sedimentology, v. 39, no. 4, p. 567-579.
- Kim, W., Mohrig, D., Twilley, R., Paola, C., and Parker, G., 2009, Is it feasible to build new land in the Mississippi River Delta: Eos, v. 90, no. 42, p. 373-374.
- Lambiase, J. J., Rahim, A. A. b. A., and Peng, C. Y., 2002, Facies distribution and sedimentary processes on the modern Baram Delta: implications for the reservoir sandstones of NW Borneo: Marine and Petroleum Geology, v. 19, no. 1, p. 69-78.
- Sassi, M. G., Hoitink, A. J. F., de Brye, B., Vermeulen, B., and Deleersnijder, E., 2011, Tidal impact on the division of river discharge over distributary channels in the Mahakam Delta: Ocean Dynamics, v. 61, no. 12, p. 2211-2228.
- Shaw, J. B., and Mohrig, D., 2014, The importance of erosion in distributary channel network growth, Wax Lake Delta, Louisiana, USA: Geology, v. 42, no. 1, p. 31-34.
- Shaw, J. B., Mohrig, D., and Whitman, S. K., 2013, The morphology and evolution of channels on the Wax Lake Delta, Louisiana, USA: Journal of Geophysical Research: Earth Surface, v. 118, no. 3, p. 1562-1584.
- Syvitski, J. P. M., and Saito, Y., 2007, Morphodynamics of deltas under the influence of humans: Global and Planetary Change, v. 57, no. 3-4, p. 261-282.
- Thompson, R. W., 1968, Tidal Flat Sedimentation on the Colorado River Delta, Northwestern Gulf of California: Geological Society of America Memoirs, v. 107, p. 1-132.
- Wolinsky, M. A., Edmonds, D. A., Martin, J., and Paola, C., 2010, Delta allometry: Growth laws for river deltas: Geophysical Research Letters, v. 37, no. 21, p. n/a-n/a.
